# Supplementary material for: Evolution of an extreme hemoglobin phenotype contributed to the sub-Arctic specialization of extinct Steller’s sea cows
Source: eLife. 2023 Jun 1;12:e85414. doi: 10.7554/eLife.85414 (PMC10284601; doi:10.7554/eLife.85414)
Supplement: Figure 2—figure supplement 1—source data 1. [file elife-85414-fig2-figsupp1-data1.xlsx]

## Sheet: Figure S1
Species	Temperature	Cofactors	pH	n50	P50
T. manatus	37°C	Stripped	6.85	2.06019	5.84681
T. manatus	37°C	Stripped	7.41	2.05378	5.17512
T. manatus	37°C	Stripped	7.98	1.86257	4.04908
T. manatus	37°C	+DPG	6.87	2.23264	10.1865
T. manatus	37°C	+DPG	7.42	2.12492	5.81578
T. manatus	37°C	+DPG	8.01	1.77326	3.60935
T. manatus	37°C	+KCl	6.85	2.61479	11.1744
T. manatus	37°C	+KCl	7.41	2.48028	8.29735
T. manatus	37°C	+KCl	7.98	1.9961	5.3437
T. manatus	37°C	+DPG+KCl	6.86	2.3834	13.7229
T. manatus	37°C	+DPG+KCl	7.33	2.24351	9.17139
T. manatus	37°C	+DPG+KCl	8.05	2.02089	5.4379
T. manatus	25°C	Stripped	6.97	1.92301	0.29944
T. manatus	25°C	Stripped	7.57	2.49013	0.2369
T. manatus	25°C	Stripped	7.93	1.93001	0.16621
T. manatus	25°C	+DPG	6.98	1.84364	0.71023
T. manatus	25°C	+DPG	7.55	1.51765	0.30402
T. manatus	25°C	+DPG	7.93	1.91455	0.15965
T. manatus	25°C	+KCl	6.97	2.03829	0.62137
T. manatus	25°C	+KCl	7.57	2.2809	0.51274
T. manatus	25°C	+KCl	7.94	1.92409	0.33595
T. manatus	25°C	+DPG+KCl	7	2.08545	0.73846
T. manatus	25°C	+DPG+KCl	7.48	2.09996	0.50197
T. manatus	25°C	+DPG+KCl	7.94	2.07679	0.34238
D. dugon	37°C	Stripped	6.84	2.45113	3.95946
D. dugon	37°C	Stripped	7.42	1.83245	3.10371
D. dugon	37°C	Stripped	7.82	2.1129	2.95354
D. dugon	37°C	+DPG	6.84	3.3029	11.3722
D. dugon	37°C	+DPG	7.41	2.03933	4.95289
D. dugon	37°C	+DPG	7.83	1.88995	3.06394
D. dugon	37°C	+KCl	6.84	2.53032	11.4383
D. dugon	37°C	+KCl	7.42	2.3077	7.17759
D. dugon	37°C	+KCl	7.82	1.70994	5.16721
D. dugon	37°C	+DPG+KCl	6.86	2.88145	13.4002
D. dugon	37°C	+DPG+KCl	7.43	2.11477	7.21946
D. dugon	37°C	+DPG+KCl	7.84	2.89366	5.97791
D. dugon	25°C	Stripped	6.96	2.32919	0.19255
D. dugon	25°C	Stripped	7.54	1.66198	-0.03508
D. dugon	25°C	Stripped	7.94	2.0613	0.00286
D. dugon	25°C	+DPG	6.96	1.98814	0.67367
D. dugon	25°C	+DPG	7.53	2.068	0.25561
D. dugon	25°C	+DPG	7.94	1.77278	0.01552
D. dugon	25°C	+KCl	6.96	2.40244	0.62574
D. dugon	25°C	+KCl	7.54	2.3015	0.39771
D. dugon	25°C	+KCl	7.94	2.56877	0.29528
D. dugon	25°C	+DPG+KCl	6.98	2.37285	0.77311
D. dugon	25°C	+DPG+KCl	7.55	1.75784	0.43064
D. dugon	25°C	+DPG+KCl	7.96	2.14428	0.30138
Anc. dugongid	37°C	Stripped	6.83	2.51196	4.87975
Anc. dugongid	37°C	Stripped	7.41	2.79841	3.74707
Anc. dugongid	37°C	Stripped	7.87	2.00278	3.6727
Anc. dugongid	37°C	+DPG	6.84	2.13722	11.9196
Anc. dugongid	37°C	+DPG	7.39	2.38039	5.53926
Anc. dugongid	37°C	+DPG	7.96	2.72224	4.74363
Anc. dugongid	37°C	+KCl	6.82	2.74943	10.8702
Anc. dugongid	37°C	+KCl	7.44	2.61959	6.70427
Anc. dugongid	37°C	+KCl	7.87	2.15503	5.85044
Anc. dugongid	37°C	+DPG+KCl	6.94	1.94099	13.5615
Anc. dugongid	37°C	+DPG+KCl	7.39	2.36198	7.25528
Anc. dugongid	25°C	Stripped	7	1.91448	0.30703
Anc. dugongid	25°C	Stripped	7.5	1.79492	0.2144
Anc. dugongid	25°C	Stripped	7.94	1.76515	0.1081
Anc. dugongid	25°C	+DPG	6.99	1.68306	0.83487
Anc. dugongid	25°C	+DPG	7.51	1.79167	0.4008
Anc. dugongid	25°C	+DPG	7.94	0.99888	0.2018
Anc. dugongid	25°C	+KCl	6.94	1.51081	0.71917
Anc. dugongid	25°C	+KCl	7.5	2.26211	0.48251
Anc. dugongid	25°C	+KCl	7.94	2.00686	0.3788
Anc. dugongid	25°C	+DPG+KCl	7.02	1.82376	0.83371
Anc. dugongid	25°C	+DPG+KCl	7.51	1.78031	0.53732
H. gigas	37°C	Stripped	6.84	2.08368	9.55353
H. gigas	37°C	Stripped	7.41	1.64174	8.80558
H. gigas	37°C	Stripped	7.8	2.79431	6.80767
H. gigas	37°C	+DPG	6.84	1.95952	10.2195
H. gigas	37°C	+DPG	7.42	2.24661	8.57088
H. gigas	37°C	+DPG	7.82	2.73735	7.63343
H. gigas	37°C	+KCl	6.84	3.54607	16.192
H. gigas	37°C	+KCl	7.41	2.26281	11.1037
H. gigas	37°C	+KCl	7.8	2.68776	9.34913
H. gigas	37°C	+DPG+KCl	6.88	2.48618	17.5256
H. gigas	37°C	+DPG+KCl	7.45	2.28614	10.9969
H. gigas	37°C	+DPG+KCl	7.85	2.59422	9.65316
H. gigas	25°C	Stripped	6.96	1.85152	0.66644
H. gigas	25°C	Stripped	7.54	1.80117	0.58176
H. gigas	25°C	Stripped	7.93	1.86376	0.48361
H. gigas	25°C	+DPG	6.96	1.6249	0.73037
H. gigas	25°C	+DPG	7.54	2.0003	0.57424
H. gigas	25°C	+DPG	7.95	1.01001	0.42778
H. gigas	25°C	+KCl	6.96	2.10685	0.93581
H. gigas	25°C	+KCl	7.54	1.8923	0.78168
H. gigas	25°C	+KCl	7.93	1.73737	0.62673
H. gigas	25°C	+DPG+KCl	6.99	2.14776	1.03188
H. gigas	25°C	+DPG+KCl	7.6	1.73939	0.72796
H. gigas	25°C	+DPG+KCl	8	1.84003	0.61399
