# Supplementary material for: Evolution of an extreme hemoglobin phenotype contributed to the sub-Arctic specialization of extinct Steller’s sea cows
Source: eLife. 2023 Jun 1;12:e85414. doi: 10.7554/eLife.85414 (PMC10284601; doi:10.7554/eLife.85414)
Supplement: Figure 2—figure supplement 2—source data 1. [file elife-85414-fig2-figsupp2-data1.xlsx]

## Sheet: Figure S2
Species	Temperature	Cofactors	pH	n50	P50
H. gigas	37°C	Stripped	6.84	2.08368	9.55353
H. gigas	37°C	Stripped	7.41	1.64174	8.80558
H. gigas	37°C	Stripped	7.8	2.79431	6.80767
H. gigas	37°C	+DPG	6.84	1.95952	10.2195
H. gigas	37°C	+DPG	7.42	2.24661	8.57088
H. gigas	37°C	+DPG	7.82	2.73735	7.63343
H. gigas	37°C	+KCl	6.84	3.54607	16.192
H. gigas	37°C	+KCl	7.41	2.26281	11.1037
H. gigas	37°C	+KCl	7.8	2.68776	9.34913
H. gigas	37°C	+DPG+KCl	6.88	2.48618	17.5256
H. gigas	37°C	+DPG+KCl	7.45	2.28614	10.9969
H. gigas	37°C	+DPG+KCl	7.85	2.59422	9.65316
H. gigas	25°C	Stripped	6.96	1.85152	0.66644
H. gigas	25°C	Stripped	7.54	1.80117	0.58176
H. gigas	25°C	Stripped	7.93	1.86376	0.48361
H. gigas	25°C	+DPG	6.96	1.6249	0.73037
H. gigas	25°C	+DPG	7.54	2.0003	0.57424
H. gigas	25°C	+DPG	7.95	1.01001	0.42778
H. gigas	25°C	+KCl	6.96	2.10685	0.93581
H. gigas	25°C	+KCl	7.54	1.8923	0.78168
H. gigas	25°C	+KCl	7.93	1.73737	0.62673
H. gigas	25°C	+DPG+KCl	6.99	2.14776	1.03188
H. gigas	25°C	+DPG+KCl	7.6	1.73939	0.72796
H. gigas	25°C	+DPG+KCl	8	1.84003	0.61399
H. gigas β82K	37°C	Stripped	7.19	1.55	5.92
H. gigas β82K	37°C	Stripped	7.19	1.423	6.36
H. gigas β82K	37°C	Stripped	7.19	1.29	5.18
H. gigas β82K	37°C	Stripped	6.9	1.444	7.02
H. gigas β82K	37°C	Stripped	7.55	1.288	3.78
H. gigas β82K	37°C	+DPG	7.2	1.626	9.23
H. gigas β82K	37°C	+DPG	7.2	1.395	11.57
H. gigas β82K	37°C	+DPG	7.19	1.309	11.97
H. gigas β82K	37°C	+DPG	6.9	1.261	14.31
H. gigas β82K	37°C	+DPG	7.55	1.459	8.38
H. gigas β82K	37°C	+KCl	9.08	1.502	7.19
H. gigas β82K	37°C	+KCl	11.77	1.445	6.9
H. gigas β82K	37°C	+KCl	7.26	1.46	7.55
H. gigas β82K	37°C	+DPG+KCl	6.9	1.35	15.74
H. gigas β82K	37°C	+DPG+KCl	7.19	1.4	12.09
H. gigas β82K	37°C	+DPG+KCl	7.55	1.462	7.92
H. gigas β82K	25°C	Stripped	7.358	1.165	1.41
H. gigas β82K	25°C	Stripped	7.068	1.378	1.92
H. gigas β82K	25°C	Stripped	7.718	1.387	1.54
H. gigas β82K	25°C	+DPG+KCl	7.068	1.243	9.25
H. gigas β82K	25°C	+DPG+KCl	7.358	1.407	5.42
H. gigas β82K	25°C	+DPG+KCl	7.718	1.423	3.49
