# Supplementary material for: Evolution of an extreme hemoglobin phenotype contributed to the sub-Arctic specialization of extinct Steller’s sea cows
Source: eLife. 2023 Jun 1;12:e85414. doi: 10.7554/eLife.85414 (PMC10284601; doi:10.7554/eLife.85414)
Supplement: Figure 2—figure supplement 3—source data 1. [file elife-85414-fig2-figsupp3-data1.xlsx]

## Sheet: Figure S4
[Ammonium Sulfate] (M)	T. manatus	D. dugon	Anc. Dugongid	H. gigas	H. gigas β82K
0	100	100	100	100	100
1.5	98.8235	N/A	97.8134	N/A	100
2	98.8235	100	96.5503	98.4127	96.0526
2.5	17.6471	93.0022	91.5524	96.8254	84.2105
3	0	0.20825	11.4763	77.7778	53.9474
3.424	N/A	N/A	N/A	15.873	N/A
3.5	0	0	0	N/A	6.57895
3.88	N/A	N/A	N/A	N/A	2.63158
