# Supplementary material for: Evolution of an extreme hemoglobin phenotype contributed to the sub-Arctic specialization of extinct Steller’s sea cows
Source: eLife. 2023 Jun 1;12:e85414. doi: 10.7554/eLife.85414 (PMC10284601; doi:10.7554/eLife.85414)
Supplement: Figure 2—source data 1. [file elife-85414-fig2-data1.xlsx]

## Sheet: Figure 2
Species	P50 Stripped	P50 +DPG+KCl	∆H Stripped	∆H +DPG+KCl	DPG Effect	Cl Effect	Bohr Effect - Stripped	Bohr Effect - +KCl+DPG	Percent Hb Precipitated
T. manatus	5.36 ± 0.18	10.90 ± 1.04	-54.26	-42.61	0.138 ± 0.039	0.233 ± 0.003	-0.141 ± 0.027	-0.336 ± 0.016	99.99 ± 3.58
D. dugon	3.51 ± 0.21	10.24 ± 1.51	-50.85	-37.39	0.297 ± 0.002	0.391 ± 0.026	-0.134 ± 0.035	-0.365 ± 0.076	99.79 ± 0.02
Anc. dugongid	4.30 ± 0.37	9.92 ± 0.00	-40.69	-24.41	0.270 ± 0.060	0.292 ± 0.009	-0.122 ± 0.051	-0.604 ± 0.000	88.51 ± 14.76
H. gigas β82K	5.39 ± 0.32	12.08 ± 0.13	-59.2542	-17.0542	0.272 ± 0.041	0.249 ± 0.006	-0.412 ± 0.021	-0.461 ± 0.033	49.01 ± 22.76
H. gigas	8.80 ± 0.72	14.34 ± 1.55	-33.6	-18.81	0.020 ± 0.043	0.172 ± 0.060	-0.147 ± 0.062	-0.273 ± 0.059	22.21 ± 23.23
